# Supplementary material for: Retroperitoneal abscess as a presentation of colon cancer: The largest case set analysis to date, which extracted from our unit and the literature
Source: Front Oncol. 2023 Oct 24;13:1198592. doi: 10.3389/fonc.2023.1198592 (PMC10629392; doi:10.3389/fonc.2023.1198592)
Supplement: Supplementary file 4 [file Table_4.xlsx]

## Sheet: Sheet1
Stable 4 Medical imaging data of a patient with retroperitoneal abscess
Reference	Tumor site	Other imaging examination	The result of CT	Iliopsoas abscess	gas	Tumor was found simultaneously	Skin and subcutaneous tissue damage	Direction of abscess flow
H. Kobayashi2001	Cecum	X-ray,Lower gastrointestinal fluorography	Computed tomography (CT) scanning of the abdomen revealed a thick wall in the right-sided colonic loop from the cecum through the ascending colon (Fig. 2a). Abscess formation was noted on the lateral side of the right psoas muscle, which was depicted as a localized low-density area on CT (Fig. 2b). A few air densities and remarkable thickening of the subcutaneous tissues were noted in the skin in…	yes	yes	yes	yes	Subcutaneous tissue of the waist and buttocks
Peterson CM 1983	adenocarcinoma	BE	Computerized tomography of the abdomen demonstrated a large low-attenuation mass involving the left iliopsoas muscle extending from the level of the lower pole of the kidney into the pelvis, and displacing the adjacent colon and small bowel anteromedially. Gas, as an air-fluid level, was present within the mass and the findings were felt to be most consistent with a psoas abscess	yes	yes	no	no	unclear
J.LLAUGER,1987	ascending colon.	BE	Computerized tomography (CT) of the abdomen demonstrated low density areas in enlarged psoas with. rim enhancement	yes	no	no	no	local
Dean D.T. Maglinte	distal descending colon and proximal sigmoid	IVU,BE	Abdominal CT. Representative section (level of L5) confirms presence of a gas-containing mass consistent with an abscess extending to psoas muscle.	yes	yes	no	unclear	local
Dean D.T. Maglinte	hepatic flexure	IVU,BE	CT at level of L5 shows a large mass primarily of soft-tissue attenuation occupying right lower abdomen. A few gas bubbles and barium particles are seen within it, consistent with an abscess.	yes	yes	no	unclear	local
Dean D.T. Maglinte	appendix	IVU,BE,ultrasound	Abdominal CT section through right lower pole shows abscess in anterior pararenal space extending into perinephric space. Abscess is posterior to the right colon	no	no	no	no	anterior pararenal space extending into perinephric space
Lopa patel 2018	caecal	X-ray,MRI,ultrasound	A large loculated iliopsoas abscess from L3/4 into the right adductor muscle was identified associated with a possible caecal mass and localised perforation.	yes	no	yes	yes	Adductor muscle group
Nigel Yong Boon Ng 2015	caecal	/	CT scan revealed a large right-sided PA, measuring 8.4×4 cm, from the level of the L2 vertebrae to the right groin (figure 1). The abscess had ruptured through the right posterior lateral abdominal wall into subcutaneous tissue with pus and gas tracking down the buttock and anterior compartment of the right thigh to the knee joint (figure 2). The gascontaining fluid collection in the right buttoc…	yes	yes	yes	yes	Subcutaneous tissue of the waist and buttocks
Rob Bisset 2010	caecal/ascending	/	CT scan of the abdomen showed a large caecal/ascending colon mass measuring 6×4 cm fistulating into a large posterolateral abdominal wall and subcutaneous right gluteal abscess measuring 6×4×4 cm.	no	unclear	yes	yes	Subcutaneous tissue of the waist and buttocks
G N Mann 1997	caecal	x-ray	CT scan of the abdomen and thigh showed a thickening of the right iliacus, distal psoas, and iliopsosas,and upper thigh.	yes	yes	no	unclear	Adductor muscle group
Zeljko Reiner 2015	appendix	x-ray，ultrasound	Computed tomography (CT) showed an inhomogeneous collection in the adductor muscles spreading from the pelvis (Fig. 1). CT of the abdomen and pelvis revealed abscess involving the entire right retroperitoneum, extending from the right diaphragm, along the right psoas muscle, and dissecting downward through the right inguinal canal into the right thigh with abscess formation between the adductor g…	yes	yes	no	no	Adductor muscle group
Kiyoshi Maeda 2022	cecum	/	CT scan demonstrated an abscess formation in iliopsoas muscle	yes	unclear	unclear	unclear	unclear
Kang Nyeong Lee 2008	descending colon	/	Abdominal CT scan revealed a mass lesion obstructing the descending colon with an abscess formation within left psoas muscle	yes	unclear	yes	unclear	unclear
Nandhagopal Vijayaraghavan 2014	cecum	/	Contrast-enhanced computed tomogram of the abdomen showing cecal wall thickening, with collection in the iliopsoas region tracking into the subcutaneous plane	yes	yes	yes	yes	Subcutaneous tissue of the waist and buttocks
Jun-Young Yang 2011	descending colon	MRI	Abdominal computed tomography, revealing abscess formation on the left psoas muscle, which was depicted as a localized low density area. Magnetic resonance imaging shows multiseptated psoas abscess and gluteal abscess.	yes	yes	no	yes	buttock mass and erythematous skin eruption
Xianlin Zeng 2017	sigmoid colon	MRI, PET-CT	computerized tomography shows mass in left psoas. low density in the left of 5th lumbar vertebral and vertebral pedicle with local destruction of the adjacent cortex and swelling of the left psoas with ill-defined low-density mass.	yes	no	no	no	local
Atsushi Okita 2007	cecal	/	A CT scan revealed a thickened cecum wall, a swollen appendix, and the spread of inflammation to the paracolonic fat tissue with abscess formation behind the cecum or ascending colon	yes	no	yes	no	local
Atsushi Okita 2007	appendix	/	A CT scan revealed a low-density area in the swollen right iliopsoas muscle accompanied by an increased density of surrounding fat tissue and a swollen appendix. In addition, the wall of the ascending colon was thickened with a spiculated contour	yes	yes	yes	no	local
Atsushi Okita 2007	sigmoid colon	x-ray	/	/	/	/	/	pelvic cavity
M T Chuang 1995	appendix	/	Abdominal computerized tomography showed a right psoas abscess	yes	/	unclear	/	local
Sugato Nawa 2005	ascending colon	/	The computed tomographyshows a large retroperitoneal, psoas and subcutaneous abscess andswelling oftheascending colon wall (arrow); Abscess was extended to the right thigh.	yes	yes	yes	/	Adductor muscle group
Mithun S. Jakkan 2018	ascending colon	MRI	Computed tomography (CT) and magnetic resonance imaging (MRI) of the abdomen showed a right-sided IPA measuring 16 cm × 9 cm × 9 cm, extending from the third lumbar vertebra up to the proximal thigh	yes	yes	no	/	Adductor muscle group
R C S Khandelwal 2021	appendix	MRI	a thick walled collection in right psoas measuring 5 × 6.2 × 18 cm which had a fistulous communication with the base of the cecum extending to the right flank	yes	yes	no	yes	Subcutaneous tissue of the waist and buttocks
Shotaro Harada 2017	ascending colon cancer		Abdominal computed tomography (CT) revealed ascending colon tumor, a large amount of free air between abdominal cavity and right thigh, and fluid collection in the retroperitoneal cavity and the psoas muscle	yes	yes	yes	yes	Subcutaneous tissue of the waist and buttocks
Alban Cacurri 2014	descending colon	ultrasound	a big abscess in the left psoas muscle,thatappearedtobeincreasedinvolumeandthatalso involved the ipsilateral obturator muscle.	yes	yes	unclear	no	local
Wen KM 2021	Ascending colon	MRI	Abdominal computed tomography showed a mass between the psoas muscle and the ascending colon, and a drainage tube was visible; C and D: Abdominal MRI showed an irregular mass with a long T1 and long T2 signal in the right posterior abdominal para-vertebral region	yes	yes	yes	yes	Subcutaneous tissue of the waist and buttocks
Wen KM 2021	Ascending colon	/	A mass in the right iliac fossa with unclear local and cecal boundaries	yes	yes	yes	yes	Subcutaneous tissue of the waist and buttocks
Wen KM 2021	Ascending colon	/	Abdominal computed tomography scan showed a mass that extended to the subcutaneous tissue	no	no	yes	no	local
Osama Mosalem 2020	descending colon	ultrasound，MRI	A computed tomography (CT) of the abdomen and pelvis was done and showed an apple-core lesion along the mid-distal segment of the descending colon with surrounding fat stranding and nodularity	no	yes	yes	yes	Adductor muscle group
Daniel Paramythiotis 2020	ascending colon	/	CT scan images showing retrocecal collection of fecal matter, without any presence of free air or fluid collection in the peritoneal cavity	/	/	/	/	/
Giovanni Terrosu 2010	cecum	/	CT scan showing a deposit behind the iliac bone.CT scan showing perinephric material and subcutaneous air in the posterior wall.	no	yes	no	yes	Subcutaneous tissue of the waist and buttocks
Vasiliki Galani 2020	ascending colon and sigmoid	/	The computed tomography (CT) scan demonstrated a low-density area in the swollen iliopsoas muscle and abdominal wall, a thickened cecum wall, and a swollen appendix	yes	unclear	yes	no	local
Raja Kalayarasan 2021	cecum	/	CECT of abdomen showing heterogeneously enhancing irregular circumferential wall thickening of cecum infiltrating the right psoas muscle with loss of fat plane with the anterolateral parietal wall	yes	unclear	yes	no	local
Shunki Iemura 2022	cecal	MRI	Computed tomography findings Computed tomography images showing retroperitoneal infiltration of cecal cancer, an abscess around the right iliacus muscle, and an abscess and subcutaneous emphysema in the right thigh	yes	yes	yes	yes	Adductor muscle group
Renata Tabola 2018	descending colon	/	Abdominal CT scan found thickening of the sigmoid colon in contact with the iliopsoas muscle and fluid collection	yes	unclear	unclear	no	local
archik Das 2017	caecal	X-ray	A CT scan of the abdomen, pelvis and thigh confirmed a diagnosis of a large yet difficult to measure loculated right iliopsoas abscess extending from the L3/L4 level into the adductor muscles of the right thigh	yes	unclear	no	yes	Adductor muscle group
Harunobu Sato 2019	hematogenous metastasis to jejunum from sigmoid colon cancer	/	Abdominal computed tomography (CT) showing a left iliopsoas abscess (arrow).	yes	unclear	yes	no	local
Yuji Takakura 2009	sigmoid colon		Abnormal air accumulation in the subcutaneous space of the left thigh.	yes	yes	yes	yes	Adductor muscle group
Haithem Zaafouri 2015	sigmoid colon	/	An abdominal CT scan was done (Figure 1) showing an aeric-hydro collection with peripheral enhancement, interesting the left psoas muscle with a continuity with the wall of the sigmoid colon	yes	unclear	yes	no	local
Hiroki Imamura 2020	descending colon	/	/	/	/	/	/	/
G R Avery 1988	sigmoid	n isotope bone scintigram, Ultrasound	Computed tomography (CT) of the abdomen showed an enlarged, thickened left psoas muscle, containing a large area of low attenuation with an enhancing rim	yes	unclear	unclear	no	local
T P Lam 1996	sigmoid	/	/	yes	/	/	/	Adductor muscle group
R. V. Pandini 2020	descending colon	/	Coronal computed tomography image of the retroperitoneal abscess and a pelvic extraperitoneal abscess (blue arrows) due to a perforated tumor on the descending colon	yes	yes	yes	yes	Adductor muscle group and retroperitoneal pelvic cavity
Yuji Haruki 2022	descending colon	/	CT scan revealed a tumor in the descending colon and fluid accumulation and extensive foamy gas in the retroperitoneal space	unclear	unclear	unclear	unclear	local
Andrej Nikolovski 2021	descending colon	/	large bowel obstruction with a site of obstruction at the level of the descending colon where a suspicious neo-infiltrative obstructing lesion was detected. The scan also showed a retroperitoneal abscess that spreads over the left lumbar region with a bubble-gas level	yes	yes	yes	no	local
Yasuhiro Fujiwara 2014	cecum	/	An irregular mass with calcification was detected in her cecum, and abdominal, intraabdominal, and retroperitoneal abscess was detected by computed tomography(CT)	unclear	unclear	yes	no	local and peritoneal cavity
Hanlei Zhou 2018	ileocecus	/	The fistulas lead to the retroperitoneum as well as retroperitoneal multi-abscesses that involve ascending colon (*) and iliopsoas	yes	unclear	no	yes	Subcutaneous tissue of the waist and buttocks
John P. Welch 1976	descending colon	/	/	/	/	/	/	/
John P. Welch 1976	cecum	/	/	/	/	/	/	/
Laura S. Heidelberg 2020	proximal right colon	/	CT of his abdomen and pelvis demonstrated a 7.1 cm proximal right colon mass with invasion into the retroperitoneum and gas tracking into adjacent soft tissues concerning for a perforated malignancy	yes	yes	yes	yes	Subcutaneous tissue of the waist and buttocks
Takayuki Yamada,2002	ascending colon		Computerized tomography (CT) scans of the abdomen revealed obstruction of the lumen of the ascending colon with a sinus tract in continuity with a cavity in the retroperitoneum	no	yes	yes	no	Subcutaneous tissue of the waist and buttocks
Naoki Aomatsu 2017	cecum and ascending colon	/	/	/	/	/	/	/
Conor D Marron 2006	caecum	X-Ray	/	unclear	yes	/	yes	Subcutaneous tissue of the waist and buttocks
Joslin Stanton 2022	sigmoid colon		Contrast-enhanced CT of the abdomen and pelvis revealed a mass-like wall thickening involving a long segment of the sigmoid colon with large complex fluid collection within the left iliopsoas musculature and left rectus sheath	yes	unclear	yes	no	local
Wenzhou Huang 2016	cecum		A computed tomography (CT) scan of the abdomen and pelvic indicatedthick wall of the ileocecum and a huge right-sided retroperitoneal abscess with gas, refer to the psoas and iliac muscles	yes	yes	no	no	Adductor muscle group
YU-PIN HO,2004	ascending colon		Abdominal CT scan revealed bowel wall thickening over the ascending colon, with one perforating hole (thin black arrow). The scan also demonstrated a retroperitoneal abscess (thick black arrow) and pneumoretroperitoneum (white arrow).	unclear	yes	yes	yes	local and peritoneal cavity
Tejas Raiyani,2011	ceacal	/	Computed Tomography (CT) of abdomen and pelvis showed right psoas abscess with air pockets	yes	yes	no	no	local
